# Supplementary material for: Youth Players Basic Need Satisfaction, Enjoyment and Pleasure within daily team sport training sessions, and the relationships with Physical Load Engagement: An intensive within-person longitudinal study
Source: Research Square preprint supplement (doi:10.21203/rs.3.rs-8338987/v1), 2026-01-16
Supplement: Supplementary file 1 [file a4898946a5e4f7fcd5f761bd.docx]

**Table 1** – Descriptives

| Table 1. Descriptive statistics and intraclass correlation for PlayerLoadTM, High Intensity Events (> 1.5m/s), Basic Needs Satisfaction, Feelings of Pleasure and Sport Enjoyment. | | |
| --- | --- | --- |
| **Variables** | ***M* (SD)** | **ICC** |
| PlayerLoadTM / min | 4.43 (1.50) | 0.24 |
| High Intensity Events (> 1.5m/s) / min | 3.80 (5.62) | 0.08 |
| Competence Satisfaction | 5.49 (1.02) | 0.62 |
| Autonmy Satisafaction | 5.43 (0.91) | 0.63 |
| Relatedness Satisfaction | 5.90 (0.98) | 0.69 |
| Feelings of Pleasure | 3.03 (1.14) | 0.29 |
| Sport Enjoyment | 4.34 (0.96) | 0.63 |
|  |  |  |

*Note*. Values are presented as means (M) and standard deviations (SD). Intraclass correlation coefficients (ICC) reflect within-person stability across training sessions. PlayerLoad™ is expressed in arbitrary units (AU) per minute and represents an accelerometer-derived composite index of external physical workload. High-intensity events represent the number of accelerations exceeding 1.5 m/s² per minute of training.

**Table 2** - Consistent Significant Effects Across All Basic Needs Models (AS, CS, RS)

| **Predictor** | **Outcome** | **Standardized Estimate (Range)** | **95% Credible Interval** | **Interpretation** |
| --- | --- | --- | --- | --- |
| Pre-practice pleasure (FS_B) | Physical workload (PL_T) | 0.14–0.17 | [0.03, 0.28] | Higher pleasure before practice predicted greater physical workload. |
| Physical workload (PL_T) | Post-practice pleasure (FS_A) | 0.09–0.09 | [0.01, 0.17] | Greater workload predicted higher post-practice pleasure. |
| Pre-practice pleasure (FS_B) | Post-practice pleasure (FS_A) | 0.55–0.55 | [0.47, 0.63] | Strong stability of pleasure before and after practice. |
| Pre-practice enjoyment (E_B) | Post-practice enjoyment (E_A) | 0.45–0.49 | [0.36, 0.56] | Enjoyment remained stable across practices. |
| Pre-practice pleasure (FS_B) | Post-practice enjoyment (E_A) | 0.13–0.15 | [0.04, 0.24] | Pleasure before practice predicted greater enjoyment after practice. |
| Need satisfaction (B) | Need satisfaction (A) (RS/CS/AS) | 0.63–0.68 | [0.56, 0.74] | All needs showed strong temporal stability. |
| Need satisfaction (A) | Post-practice pleasure (FS_A) | 0.11–0.23 | [0.01, 0.31] | Greater need satisfaction related to higher pleasure after practice. |
| Need satisfaction (A) | Post-practice enjoyment (E_A) | 0.08–0.14 | [0.01, 0.24] | Need satisfaction after practice linked with enjoyment. |
| Post-practice pleasure (FS_A) | Post-practice enjoyment (E_A) | 0.24 | [0.13, 0.33] | Pleasure and enjoyment were strongly correlated after practice. |
| Pleasure before (FS_B) | Enjoyment before (E_B) | 0.33 | [0.23, 0.42] | Strong positive correlation between pleasure and enjoyment before practice. |

*Note*. All coefficients are standardized Bayesian estimates. Statistical credibility was determined using 95% credible intervals (CI); effects were considered credible when the interval did not include zero.

**Table 3** – Additional Significant Effects Unique to One or Two Models

| **Predictor** | **Outcome** | **Model(s)** | **Estimate** | **95% Credible Interval** | **Interpretation** |
| --- | --- | --- | --- | --- | --- |
| Pre-practice enjoyment (E_B) | Post-practice pleasure (FS_A) | RS, CS | 0.09–0.10 | [0.01, 0.17] | Enjoyment before practice predicted greater pleasure after. |
| Competence before (CS_B) | Post-practice enjoyment (E_A) | CS only | 0.15 | [0.07, 0.24] | Competence satisfaction predicted enjoyment after practice. |
| Autonomy before (AS_B) | Post-practice pleasure (FS_A) | AS only | 0.09 | [0.01, 0.17] | Autonomy before practice linked with post-practice pleasure. |
| Relatedness after (RS_A) | Post-practice pleasure (FS_A) | RS only | 0.15 | [0.06, 0.24] | Relatedness after practice related to higher pleasure. |
| Competence after (CS_A) | Post-practice pleasure (FS_A) | CS only | 0.23 | [0.13, 0.31] | Post-practice competence linked with pleasure. |
| Autonomy after (AS_A) | Post-practice pleasure (FS_A) | AS only | 0.11 | [0.01, 0.20] | Autonomy after practice related to higher pleasure. |
| Autonomy after (AS_A) | Post-practice enjoyment (E_A) | AS only | 0.14 | [0.04, 0.24] | Autonomy after practice related to higher enjoyment. |
| Competence after (CS_A) | Post-practice enjoyment (E_A) | CS only | 0.08 | [0.01, 0.19] | Competence after practice correlated with enjoyment. |
| Relatedness before (RS_B) | Pleasure before (FS_B) | RS only | 0.43 | [0.34, 0.50] | Relatedness associated with pre-practice pleasure. |
| Competence before (CS_B) | Pleasure before (FS_B) | CS only | 0.37 | [0.28, 0.45] | Competence related to pre-practice pleasure. |
| Autonomy before (AS_B) | Pleasure before (FS_B) | AS only | 0.36 | [0.28, 0.44] | Autonomy associated with greater pre-practice pleasure. |

*Note*. All coefficients are standardized Bayesian estimates. Statistical credibility was determined using 95% credible intervals (CI); effects were considered credible when the interval did not include zero.
